1 Enhancer control of miR-155 expression in Epstein-Barr virus infected B cells

2

3 C. David Wood,<sup>a</sup> Thomas Carvell,<sup>a</sup> Andrea Gunnell,<sup>a</sup> Opeoluwa O. Ojieniyi,<sup>a</sup> Cameron

4 Osborne,<sup>b</sup> Michelle J. West<sup>a#</sup>

5

6 <sup>a</sup>School of Life Sciences, University of Sussex, Falmer, Brighton, UK.

7 <sup>b</sup>Department of Medical and Molecular Genetics, King's College London School of

8 Medicine, Guy's Hospital, London, UK

9

10 Running Head: Enhancer control of miR-155

11

12 #Address correspondence to Michelle J. West, [m.j.west@sussex.ac.uk](mailto:m.j.west@sussex.ac.uk)

13

14 Abstract word count: 213

15 Text word count: 5472

16 **ABSTRACT**

17 The oncogenic microRNA-155 (miR-155) is the most frequently upregulated miRNA in  
18 Epstein-Barr virus (EBV)-positive B cell malignancies and is upregulated in other non-  
19 viral lymphomas. Both the EBV nuclear antigen 2 (EBNA2), and B cell transcription  
20 factor, interferon regulatory factor 4 (IRF4) are known to activate transcription of the host  
21 cell gene from which miR-155 is processed (*miR-155HG*, BIC). EBNA2 also activates  
22 *IRF4* transcription indicating that EBV may upregulate miR-155 through direct and  
23 indirect mechanisms. The mechanism of transcriptional regulation of *IRF4* and *miR-*  
24 *155HG* by EBNA2 however has not been defined. We demonstrate that EBNA2 can  
25 activate *IRF4* and *miR-155HG* expression through specific upstream enhancers that are  
26 dependent on the Notch signaling transcription factor RBPJ, a known binding partner of  
27 EBNA2. We demonstrate that in addition to activation of the *miR-155HG* promoter, IRF4  
28 can also activate *miR-155HG* via the upstream enhancer also targeted by EBNA2. Gene  
29 editing to remove the EBNA2- and IRF4-responsive *miR-155HG* enhancer located 60 kb  
30 upstream of *miR-155HG* led to reduced *miR155HG* expression in EBV-infected cells. Our  
31 data therefore demonstrate that specific RBPJ-dependent enhancers regulate the IRF4-  
32 miR-155 expression network and play a key role in the maintenance of miR-155 expression  
33 in EBV-infected B cells. These findings provide important insights that will improve our  
34 understanding of miR-155 control in B cell malignancies.

35

36 **IMPORTANCE**

37 MicroRNA-155 (miR-155) is expressed at high level in many human cancers particularly  
38 lymphomas. Epstein-Barr virus (EBV) infects human B cells and drives the development

39 of numerous lymphomas. Two EBV-encoded genes (LMP1 and EBNA2) upregulate miR-  
40 155 expression and miR-155 expression is required for the growth of EBV-infected B cells.  
41 We show that the EBV transcription factor EBNA2 upregulates miR-155 expression by  
42 activating an enhancer upstream from the miR-155 host gene (*miR-155HG*) from which  
43 miR-155 is derived. We show that EBNA2 also indirectly activates *miR-155* expression  
44 through enhancer-mediated activation of *IRF4*. IRF4 then activates both the *miR-155HG*  
45 promoter and the upstream enhancer, independently of EBNA2. Gene editing to remove  
46 the *miR-155HG* enhancer leads to a reduction in *miR-155HG* expression. We therefore  
47 identify enhancer-mediated activation of *miR-155HG* as a critical step in promoting B cell  
48 growth and a likely driver of lymphoma development.  
49

## 50 INTRODUCTION

51 MicroRNAs (miRNAs) are a class of highly conserved, non-coding RNA molecules of 18-  
52 25 nucleotides in length that play an important role in post-transcriptional gene control.  
53 MiRNAs hybridize to target mRNAs, often in the 3' untranslated region, and promote their  
54 degradation and/or inhibit their translation. MiRNAs can be transcribed from specific  
55 promoters or processed from coding or non-coding gene transcripts. Deregulation of  
56 miRNA expression is implicated in the pathogenesis of many diseases, including a diverse  
57 range of human cancers and the term oncomiR is used to describe miRNAs with tumor-  
58 promoting properties (1).

59

60 The miR-155 oncomiR was originally discovered as a non-coding RNA within the B cell  
61 integration cluster (*BIC*) gene (2). *Bic* was previously identified as a proto-oncogene  
62 activated by proviral insertion in avian leucosis virus-induced lymphomas (3, 4). The miR-  
63 155 locus is highly conserved across species and in humans lies within the third exon of  
64 *BIC* (miR-155 host gene; *miR-155HG*). MiR-155 appears to play a key role in the  
65 regulation of B lymphocyte function. Transcription of *miR-155HG* is activated upon B cell  
66 receptor signaling and in murine models dysfunction or loss of miR-155 in B lymphocytes  
67 causes a severe decrease in antibody-induced signaling (5, 6). Overexpression of miR-155  
68 in mice results in the development of precursor B lymphoproliferative disorders and B cell  
69 lymphomas (7). MiR-155 expression is highly upregulated in a number of human  
70 lymphomas including Hodgkin's and diffuse large cell B-cell lymphoma (5, 8, 9). The basis  
71 of the oncogenic activity of miR-155 has not been fully elucidated however a number of  
72 target genes that regulate B cell proliferation and survival have been identified. These

73 include transcription regulators, receptors and signaling pathway components e.g. *HDAC4*,  
74 *PIK3R1*, *SMAD5*, *SHIP1*, *PU.1*, *BCL2* and *C/EBP $\beta$*  (10, 11).

75

76 Epstein-Barr virus (EBV) immortalizes human B lymphocytes and is associated with the  
77 development of numerous lymphomas including Burkitt's, Hodgkin's and diffuse large B  
78 cell (DLBCL). MiR-155 expression is upregulated on B cell infection by EBV (12). In *in*  
79 *vitro* EBV transformed B cell lines (lymphoblastoid cell lines; LCLs) and an EBV-positive  
80 DLBCL cell line, loss of miR-155 expression inhibits cell growth and induces apoptosis  
81 indicating that miR-155 expression is important for transformed B cell survival (13). MiR-  
82 155 expression in LCLs appears to attenuate high levels of NF- $\kappa$ B signaling and this may  
83 help promote B cell proliferation and prevent apoptosis (14). Consistent with a key role for  
84 gene regulation by miR-155 in viral-induced oncogenesis, the oncogenic herpesviruses  
85 Kaposi's sarcoma herpesvirus and Marek's disease herpes virus encode miR-155 mimics  
86 in their viral genomes (15-17).

87

88 Two EBV genes essential for B cell transformation upregulate miR-155 expression; the  
89 constitutively active CD40 receptor mimic, latent membrane protein 1 (LMP1) and the  
90 viral transcription factor, Epstein-Barr virus nuclear antigen 2 (EBNA2) (13, 14).  
91 Expression of either LMP1 or EBNA2 independently activates transcription of *miR-155HG*  
92 (14). Upregulation of AP-1 and NF- $\kappa$ B activity by LMP1 appears to play an important role  
93 in activation of the miR-155 promoter in EBV-infected cells (18, 19). The mechanism of  
94 EBNA2 activation of miR-155 has not been demonstrated. EBNA2 is required for B cell  
95 immortalization by EBV and activates all viral gene promoters, including LMP1, so

96 indirect activation of miR-155 via upregulation of LMP1 is a likely consequence of  
97 EBNA2 expression (20, 21). However, EBNA2 also deregulates host gene transcription by  
98 binding to promoter and enhancer elements (22, 23). Enhancer and super-enhancer  
99 activation by EBNA2 appears to be widespread in the B cell genome (23-25). For example,  
100 EBNA2 activation of the *MYC* proto-oncogene is directed by the targeting of upstream  
101 enhancers and modulation of enhancer-promoter looping (22, 26). EBNA2 does not bind  
102 DNA directly and associates with viral and cellular gene regulatory elements through its  
103 interactions with cellular transcription factors that include RBPJ, PU.1 and EBF1 (27).

104

105 An EBNA2-bound super-enhancer postulated to control miR-155 expression was  
106 identified in LCLs based on the binding of a number of EBV transcription factors (EBNA2,  
107 EBNA3A, EBNA3C and EBNA-LP), binding of NF- $\kappa$ B subunits and broad and high  
108 histone H3 lysine 27 acetylation signals (25). However, the original region identified  
109 actually comprises the highly expressed 20 kb *miR-155HG* transcription unit from which  
110 miR-155 is derived. A subsequent study using RNA polymerase II (RNA pol II) chromatin  
111 interaction analysis by paired-end tag sequencing (ChIA-PET) found that RNA pol II  
112 associated with a number of EBNA2-bound promoter, enhancer and super-enhancer  
113 regions upstream of *miR-155HG* that formed links with the *miR-155HG* promoter (28).  
114 Whether EBNA2 can activate *miR-155HG* transcription via the *miR-155HG* promoter or  
115 these putative enhancer elements however has not been investigated.

116

117 MiR-155 expression is also activated by interferon regulatory factor 4 (IRF4) through an  
118 interferon-stimulated response element (ISRE) in the *miR-155HG* promoter (29).

119 Interestingly, IRF4 levels are highly upregulated in EBV infected cells and like miR-155,  
120 *IRF4* is also induced by both LMP1 and EBNA2 (30). As a result, *IRF4* and miR-155 levels  
121 correlate in EBV infected cells. In addition to the potential indirect effects of EBNA2 on  
122 *IRF4* expression via LMP1 upregulation, conditional expression of EBNA2 in the presence  
123 of protein synthesis inhibitors also demonstrates that *IRF4* is a direct target gene of EBNA2  
124 (31). The mechanism of EBNA2 activation of *IRF4* has not been demonstrated. IRF4  
125 expression is essential for the growth and survival of LCLs and apoptosis induced by IRF4  
126 depletion can be partially rescued by expression of miR-155 (29, 32). This indicates that  
127 the upregulation of miR-155 by IRF4 may be a key component of its essential role in  
128 promoting LCL growth.

129

130 To obtain important information on how the IRF4/miR-155 expression network is  
131 controlled by EBV, we investigated the role of putative upstream EBNA2-bound enhancer  
132 elements in the regulation of *miR-155HG* and *IRF4* expression. At both gene loci we  
133 identified specific EBNA2-bound enhancer elements that activate transcription of their  
134 respective promoters in an RBPJ-dependent manner. Deletion of the EBNA2-responsive  
135 *miR-155HG* enhancer resulted in a decrease in *miR-155HG* transcription in EBV-infected  
136 cells demonstrating its importance for the maintenance of miR-155 expression. These data  
137 identify key enhancer elements utilized by EBV for the control of two genes critical for B  
138 cell growth that is relevant to the study of miR-155 and *IRF4* deregulation in other tumor  
139 contexts.

140

141 **RESULTS**

142 *A miR-155HG upstream enhancer is activated by EBNA2 through RBPJK*

143 To obtain information on regulatory elements that may control miR-155 expression, we  
144 examined *miR-155HG* promoter interaction data obtained by the genome-wide  
145 chromosome conformation technique, capture Hi-C (CHi-C) (Figure 1). In both the  
146 GM12878 LCL and in CD34+ hematopoietic progenitor cells, the *miR-155HG* promoter  
147 interacts with three main upstream regions marked by high levels of H3K27ac indicating  
148 transcription regulatory function. These include two intergenic regions and an intragenic  
149 region proximal to the promoter of the *LINC00158* non-coding RNA gene (Figure 1). The  
150 same *miR-155HG* interacting regions were also detected by RNA pol II ChIA-PET (28).  
151 Interestingly, CHi-C data demonstrates that the miR-155 genomic locus within exon 3 of  
152 *miR-155HG* interacts at a much lower frequency with the two intergenic regions (Figure  
153 1). This suggests that these interactions more frequently involve the *miR-155HG* promoter,  
154 consistent with a role in regulating transcription. The miR-155 genomic locus does  
155 however interact with the *LINC00158* promoter proximal region, consistent with a gene to  
156 gene looping interaction between *miR-155HG* and *LINC00158* (Figure 1). The *miR-*  
157 *155HG-LINC00158* interaction is also the main interaction detected in this region by ChiA-  
158 PET for the chromatin organizing factor CTCF, suggesting it may be involved in domain  
159 organization rather than *miR-155HG* promoter regulation (28). Our EBNA2 chromatin  
160 immunoprecipitation ChIP-sequencing data from the same LCL used for CHi-C detects the  
161 highest EBNA2 binding at two sites within the most proximal intergenic region (24)  
162 (Figure 1). We therefore investigated the role of these two EBNA2-bound putative  
163 enhancers in the regulation of *miR155-HG*.

164



165 We generated luciferase reporter plasmids containing the *miR-155HG* promoter and one  
166 or both of the enhancer elements (E1 and E2). Reporter assays carried out in the EBV  
167 negative B cell line DG75 in the absence or presence of transient EBNA2 expression  
168 demonstrated that EBNA2 had no effect on the *miR-155HG* promoter but activated  
169 transcription up to 7.3-fold when a region encompassing both E1 and E2 was inserted  
170 upstream of the promoter (Figure 2A). The level of activation was similar to that observed  
171 for the EBNA2 responsive EBV C promoter (Figure 2B). When testing each enhancer  
172 separately, we found that the presence of E1 alone did not convey EBNA2 responsiveness,  
173 but it increased basal transcription levels compared to the promoter alone by approximately  
174 2-fold (Figure 2A). This indicates that E1 has EBNA2-independent enhancer function.  
175 EBNA2 activated transcription via E2 alone up to 10.8-fold indicating that E2 is an  
176 EBNA2-responsive enhancer (Figure 2A). Interestingly, the presence of E2 decreased  
177 basal transcription levels approximately 5-fold compared to the promoter alone (Figure  
178 2A). This is consistent with the presence of repressive elements in the enhancer that can  
179 limit basal transcription activity, a feature we observed previously for the main EBNA2-  
180 responsive enhancer at *RUNX3* (24). As a result, the overall level of transcription in the  
181 presence of E2 was lower than that in the presence of E1 and E2 combined (Figure 2A).  
182 Since EBNA2 upregulates *IRF4* and IRF4 is a known activator of *miR-155HG*, we  
183 investigated whether the effects of EBNA2 in these reporter assays may be indirect and the  
184 result of increased endogenous IRF4 expression. We found that transient expression of  
185 EBNA2 did not increase endogenous IRF4 expression (Figure 2A). We conclude that  
186 EBNA2 independent and EBNA2-dependent enhancers regulate *miR-155HG* transcription

187 in EBV-infected cells and that EBNA2 activates transcription directly via association with  
188 a specific *miR-155HG* enhancer.

189

190 EBNA2 binds to many target gene enhancers through the cell transcription factor RBPJ  
191 (CBF1)(22). We investigated whether EBNA2 activation of *miR-155HG* E2 was mediated  
192 via RBPJ. ChIP-QPCR analysis of RBPJ binding in the GM12878 LCL detected RBPJ  
193 binding at E2 and not E1, consistent with a role for RBPJ in EBNA2 activation of E2  
194 (Figure 2C). To confirm this, we carried out reporter assays in a DG75 RBPJ knock-out  
195 cell line (33). This cell line was derived from a different parental DG75 cell line that also  
196 lacks IRF4 expression, so for comparison we also carried out reporter assays in the parental  
197 DG75 wild type cell line (Figure 2D). Our data demonstrated that EBNA2 activated  
198 transcription of the *miR-155HG* E1 and E2 containing reporter construct in the wild type  
199 DG75 cell line to the same extent as the EBV C promoter control, confirming our previous  
200 results (Figure 2D). However in DG75 RBPJ knock-out cells, the activation of this reporter  
201 construct by EBNA2 was almost completely abolished (Figure 2D). This mirrored the loss  
202 of EBNA2 activation observed for the RBPJ-dependent viral C promoter (Figure 2E).  
203 These data also provide further evidence that EBNA2 activation of *miR-155HG* E2 is not  
204 an indirect effect mediated by IRF4 upregulation and we confirmed that IRF4 expression  
205 is not induced by EBNA2 in this cell background (Figure 2D).

206

207 Interestingly, EBNA2 binding sites often coincide with binding sites for IRF4 or IRF4-  
208 containing transcription complexes, indicating that IRF4 may be involved in EBNA2  
209 binding to DNA (25, 34). However, our results indicate that IRF4 is not required for

210 EBNA2 targeting of *miR-155HG* E2 enhancer element since EBNA2 activation was  
211 efficient in the absence of IRF4 (Figure 1D). We conclude that EBNA2 can directly  
212 upregulate *miR-155HG* transcription through a distal RBPJ-dependent enhancer (E2)  
213 independently of IRF4.

214

215 *IRF4 independently activates miR-155HG via promoter and enhancer elements*

216 Our data demonstrate that IRF4 is not required for the effects of EBNA2 on *miR-155HG*  
217 transcription. However, IRF4 can independently activate the *miR-155HG* promoter  
218 through an ISRE (29). It is not known whether IRF4 can also activate *miR-155HG*  
219 transcription through enhancer elements. We therefore tested whether exogenous  
220 expression of IRF4 in DG75 cells can activate *miR-155HG* transcription via upstream  
221 enhancers. Because IRF4 activates the control plasmid (pRL-TK), Firefly reporter activity  
222 was normalized to actin expression as a previously described alternative in these assays  
223 (35). Consistent with published data, we found that exogenous expression of IRF4 resulted  
224 in a 4-fold increase in *miR-155HG* promoter activity (29). The presence of E1 did not result  
225 in any further increase in *miR-155HG* transcription by IRF4 (Figure 3). However, the  
226 additional presence of E2 increased the activation of the *miR-155HG* reporter to 10-fold.  
227 These data demonstrate that *miR-155HG* E2 is IRF4-responsive and contributes to IRF4  
228 activation of *miR-155HG* transcription.

229

230 Taken together our results indicate that *miR-155HG* promoter activation by IRF4 and the  
231 independent effects of IRF4 and EBNA2 on a specific *miR-155HG* enhancer contribute to  
232 the high level expression of *miR-155HG* and miR-155 in EBV-infected B cells.

233

234 *An IRF4 upstream enhancer is activated by EBNA2 through RBPJ*

235 Our data support a role for IRF4 as a key regulator of *miR-155HG* expression in EBV  
236 infected cells. *IRF4* is also an EBNA2 target gene, but the mechanism of *IRF4* upregulation  
237 by EBNA2 has not been defined (29, 31). RNA pol II ChiA-PET analysis recently  
238 identified a number of upstream regions that interact with *IRF4* in the GM12878 LCL (28).  
239 These include the transcription unit of *DUSP22*, an intergenic region upstream from  
240 *DUSP22* predicted to be a super-enhancer and intergenic regions between *IRF4* and  
241 *DUSP22*. The upstream super-enhancer linked to both *DUSP22* and *IRF4*, so likely  
242 represents an important regulatory region (28). EBNA2 ChIP-sequencing data that we  
243 obtained using EBV infected cells derived from a Burkitt's lymphoma cell line additionally  
244 identified two large EBNA2 binding peaks within the region 35 kb directly upstream of  
245 *IRF4* (Figure 4A). We investigated the potential role of these regions in EBNA2 activation  
246 of *IRF4*. These putative proximal and distal EBNA2-bound enhancer regions are referred  
247 to as *IRF4* enhancer 1 (E1) and *IRF4* enhancer 2 (E2), respectively (Figure 4A). Luciferase  
248 reporter assays carried out in the two different DG75 cell line clones in the absence or  
249 presence of transient EBNA2 expression demonstrated that EBNA2 had a small activating  
250 effect on the *IRF4* promoter (Figure 4B and D). The presence of *IRF4* E1 reduced basal  
251 transcription by 2-fold and increased EBNA2 activation to up to 6.6-fold similar to the  
252 level of EBNA2 activation observed for the EBV C promoter (Figure 4B). The additional  
253 inclusion of *IRF4* E2 alongside *IRF4* E1 had little further effect on EBNA2 activation  
254 (Figure 4B). These data indicate that *IRF4* E1 acts as an EBNA2-responsive enhancer.  
255 Consistent with EBNA2 activation through RBPJ, ChIP-QPCR detected RBPJ binding at

256 *IRF4* E1 and not E2 (Figure 4C). Accordingly, EBNA2 activation of the *IRF4* enhancer  
257 construct was decreased from 5.7-fold to 1.9 fold in RBPJ knock out cells. Our data  
258 therefore demonstrate that EBNA2 can activate *IRF4* transcription through an RBPJ-  
259 dependent enhancer (E1) located 13 kb upstream from the transcription start site (TSS).

260

#### 261 *Deletion of miR-155HG E2 from the B cell genome reduces miR-155HG expression*

262 Since EBNA2 and IRF4 can activate transcription through *miR-155HG* E2 in reporter  
263 assays, we next tested the role of this enhancer in the regulation of *miR-155HG* in EBV  
264 infected B cells. To do this, we used CRISPR/Cas9 gene editing to remove the region  
265 encompassing E2 (Figure 5A) from the genome of the EBV immortalized LCL IB4. We  
266 designed two small guide RNAs (sgRNAs), one targeting a region 5' to the enhancer and  
267 one targeting a region 3' to the enhancer, so that DNA repair following Cas9 cleavage  
268 would generate an E2 deletion (Figure 5A). Both sgRNAs comprised 20 nucleotide  
269 sequences that target the genomic region adjacent to a protospacer adjacent motif (PAM)  
270 required for Cas9 cleavage (Figure 5C). sgRNAs were transfected into IB4 cells alongside  
271 Cas9 protein and single cell clones were generated by limiting dilution. PCR screening was  
272 used to identify cell line clones containing E2 deletions using a forward primer located 5'  
273 of the E2 region and a reverse primer located 3' of E2 to amplify a 180 bp DNA product  
274 across the deletion site (Figure 5A and B). This primer set did not amplify DNA from intact  
275 templates containing E2 as the amplicon (1.75 kb) was too large for efficient amplification  
276 under the conditions used. For three cell line clones tested (C4D, C2B and C5B) we  
277 detected amplification of a 180 bp PCR product consistent with the presence of an E2  
278 deletion (Figure 5B). We did not detect this PCR product in parental IB4 cells and an

279 additional clone, C4A indicating that this cell line clone did not contain a deletion (Figure  
280 5B). Sequencing of the PCR products amplified across the deletion site confirmed the E2  
281 deletion (Figure 5C). Clones C4D and C2B contained deletions consistent with cleavage  
282 by Cas9 three bases upstream from the PAM sequence as expected, and the subsequent  
283 ligation of the cleaved ends. Clone C5D had an additional deletion of 8 nucleotides at the  
284 5' cut site indicating loss of a small amount of additional DNA during the DNA repair and  
285 religation process (Figure 5C).

286

287 We next used real-time PCR analysis to determine whether deletion of *miR-155HG* E2  
288 affected the levels of endogenous *miR-155HG* RNA in IB4 cells. We found that all three  
289 deletion mutant cell line clones had reduced levels of *miR-155HG* transcripts compared to  
290 parental IB4 cells or the non-deleted C4A cell line (Figure 5D). *miR-155HG* RNA  
291 expression was reduced by 47%, 63% and 78% in cell line clones C4D, C2B and C5B,  
292 respectively (Figure 5D). This indicates that the RBPJ-dependent EBNA2 responsive  
293 enhancer (E2) located 60 kb upstream of *miR-155HG* plays an important role in  
294 maintaining *miR-155HG* expression in EBV infected cells. Given that miR-155 is derived  
295 by processing of the *miR-155HG* transcript, our data indicate that this enhancer would be  
296 important in controlling miR-155 expression.

297

298 In summary we have identified and characterized new enhancer elements that play a key  
299 role in the direct and indirect upregulation of miR-155 expression in EBV infected cells by  
300 the EBV transcription factor EBNA2 (Figure 6). Importantly, we show that an EBNA2 and

301 IRF4 responsive enhancer element located 60 kb upstream from the *miR-155HG* TSS is  
302 essential to maintain high level *miR-155HG* RNA expression.

303

## 304 **DISCUSSION**

305 We have characterized an enhancer 60 kb upstream of the miR-155-encoding gene *miR-*  
306 *155HG* that is bound by EBNA2, the key transcriptional regulator encoded by Epstein-Barr  
307 virus. We have shown that the presence of this enhancer in the B cell genome is required  
308 to maintain high level *miR-155HG* expression in an EBV-infected B cell line, indicating  
309 that enhancer control is critical for miR-155 upregulation by the virus. This enhancer  
310 (enhancer 2) was responsive to EBNA2 in reporter assays and EBNA2 activation was  
311 dependent on the expression of host cell protein RBPJ. Since EBNA2 cannot bind DNA  
312 directly, this is in line with EBNA2 binding via its interaction with RBPJ (36, 37). *MiR-*  
313 *155HG* enhancer 2 also contains binding sites for a number of other B cell transcription  
314 factors (e.g. SPI1 (PU.1), RUNX3, NF- $\kappa$ B rel A, BATF and SRF) that likely play a role in  
315 regulating its activity in uninfected B cells. It is also possible that some of these  
316 transcription factors may help to stabilize EBNA2 or EBNA2-RBPJ binding in the context  
317 of B cell chromatin, a scenario that we cannot examine in reporter assays. PU.1 for example  
318 has been shown to bind EBNA2 (38). However, in reporter assays loss of RBPJ alone  
319 severely diminishes EBNA2 responsiveness indicating that RBPJ is the major mediator of  
320 EBNA2 activation of *miR-155HG* enhancer 2.

321

322 MiR-155HG enhancer 2 is located within a region upstream of *miR-155HG* that is detected  
323 by ChI-C and RNA pol II ChIA-PET to associate with the *miR-155HG* promoter.

324 Although, another putative enhancer bound by EBNA2 in the GM12878 LCL (enhancer 1)  
325 is also present in this region, we found that enhancer 1 was not EBNA2 responsive but did  
326 upregulate transcription from the *miR-155HG* promoter in reporter assays. This indicates  
327 that this region possesses EBNA2-independent enhancer function. The detected EBNA2  
328 binding at enhancer 1 may therefore be the consequence of looping between enhancer 1  
329 and enhancer 2 that would lead to the precipitation of this region of DNA in EBNA2 ChIP  
330 experiments. Interestingly, binding at enhancer 1 is not detected by EBNA2 ChIP-seq in a  
331 BL cell background (23), so its activity and looping interactions may be cell-type  
332 dependent. Two further upstream regions also interact with the *miR-155HG* promoter by  
333 ChI-C and RNA pol II ChIA-PET in LCLs (one intergenic and one proximal to the  
334 *LINC00158* promoter). This is consistent with the presence of an active enhancer-promoter  
335 hub formed between two intergenic enhancer regions (one of which encompasses enhancer  
336 2) and the promoter-proximal regions of *miR-155HG* and *LINC00158*. In two EBV infected  
337 LCL backgrounds (GM12878 and IB4), maximal EBNA2 (and RBPJ) binding at the *miR-*  
338 *155HG* locus is detected in the intergenic interacting region encompassing *miR-155HG*  
339 enhancer 2 (22, 24, 28). This is despite the classification of the remaining intergenic region  
340 and the *LINC00158* promoter proximal region as EBV super-enhancers based on their  
341 chromatin and TF landscape profiles (28). It is therefore possible that EBNA2 accesses the  
342 *miR-155HG* enhancer hub and upregulates miR-155 expression through its RBPJ-  
343 dependent association with *miR-155HG* enhancer 2. Our observations highlight the  
344 importance of testing the EBNA2 responsiveness of EBNA2-bound regions rather than  
345 relying on binding profiles alone to assign EBNA2 enhancer function.  
346



347 The constitutively active EBV membrane protein LMP1 also activates *miR-155HG*  
348 transcription. NF- $\kappa$ B and AP-1 sites in the *miR-155HG* promoter have been shown to be  
349 important to maintain *miR-155HG* promoter activity in LCLs and two NF- $\kappa$ B sites and the  
350 AP-1 site mediate LMP1 responsiveness in transiently transfected EBV negative cells (18,  
351 19). NF- $\kappa$ B RelA also binds to the *miR-155HG* enhancer 2 region and the putative  
352 upstream super-enhancer, so it is also possible that LMP1 activation of the NF- $\kappa$ B and AP-  
353 1 pathways also activates *miR-155HG* enhancers. Thus promoter (and possibly enhancer)  
354 activation by LMP1 and enhancer activation by EBNA2 may all contribute to the high-  
355 level miR-155 expression observed in EBV-infected cells.

356

357 Our results also revealed that the B cell transcription factor IRF4 can also activate *miR-*  
358 *155HG* transcription via enhancer 2 in addition to its known effects on the *miR-155HG*  
359 promoter. IRF4 activates the *miR-155HG* promoter via an ISRE. There are no ISREs within  
360 *miR-155HG* enhancer 2, but the 5' sequence of the PU.1 binding site partially matches a  
361 reverse ETS-IRF composite element (EICE), so IRF4 could bind in combination with PU.1.  
362 In addition to direct control of miR-155 expression through the *miR-155HG* enhancer,  
363 EBNA2 also indirectly influences miR-155 expression through the transcriptional  
364 upregulation of *IRF4*. We demonstrate that again enhancer control by EBNA2 plays an  
365 important role in *IRF4* activation. In addition to the presence of an EBNA2-bound super-  
366 enhancer upstream of the neighboring *DUSP22* gene (28), we found that EBNA2 can also  
367 upregulate *IRF4* transcription through an RBPJ dependent enhancer located in an  
368 intergenic region 35 kb upstream from *IRF4*. At *IRF4* and *DUSP22*, EBNA2 therefore  
369 likely targets multiple enhancers and super-enhancers.

370

371 MiR-155 is overexpressed in many tumor contexts, including hematological malignancies  
372 and is implicated in cancer therapy resistance (11). It therefore represents an important  
373 therapeutic target. The first in human phase I trial of a synthetic locked nucleic acid anti-  
374 miR to miR-155 has been initiated and preliminary results show that the inhibitor is well  
375 tolerated in patients with cutaneous T cell lymphoma when injected intratumorally (39).  
376 Inhibition of miR-155 expression through indirect transcriptional repression has also been  
377 tested in acute myeloid leukemia cells using an inhibitor of the NEDD8-activating enzyme  
378 (40). NEDD8-dependent ubiquitin ligases regulate NF- $\kappa$ B activity and their inhibition by  
379 MLN4924 in AML cells results in reduced binding of NF- $\kappa$ B to the *miR-155HG* promoter  
380 and a reduction in miR-155 expression. In mice engrafted with leukemic cells, MLN4924  
381 treatment reduced miR-155 expression and increased survival. These data provide evidence  
382 for transcriptional inhibition of miR-155 as a therapeutically viable strategy.

383

384 The sensitivity of super-enhancers to transcriptional inhibitors is also being exploited as a  
385 therapeutic strategy in various tumor contexts. Super-enhancers often drive the high-level  
386 expression of oncogenes and super-enhancer inhibition by CDK7 and BET inhibitors can  
387 effectively block tumor cell proliferation and enhance survival in mouse models of disease  
388 (41-43). MiR-155 expression in human umbilical vein endothelial cells is sensitive to  
389 inhibition by BET and NF- $\kappa$ B inhibitors (44). This was proposed to result from inhibition  
390 of an upstream miR-155 super-enhancer, but the region examined actually represents the  
391 *miR-155HG* transcription unit, which has high-level histone H3 K27 acetylation (used as a  
392 super-enhancer marker) throughout its length when *miR-155HG* is transcriptionally active.

393 Nonetheless, the study highlights the usefulness of transcription inhibitors in reducing  
394 miR-155 expression. Our identification and characterisation of the enhancers that drive  
395 *miR-155HG* transcription in B cells may therefore open up new therapeutic opportunities  
396 for the inhibition of miR-155 expression in numerous B cell cancer contexts where miR-  
397 155 is a key driver of tumor cell growth.  
398

399 **METHODS**

400 *Cell lines*

401 All cell lines were cultured in RPMI 1640 media (Invitrogen) supplemented with 10% Fetal  
402 Bovine serum (Gibco), 1 U/ml penicillin G, 1 µg/ml streptomycin sulphate and 292 µg/ml  
403 L-glutamine at 37°C in 5% CO<sub>2</sub>. Cells were routinely passaged twice-weekly. The DG75  
404 cell line originates from an EBV negative BL (45). DG75 cells cultured in our laboratory  
405 (originally provided by Prof M. Rowe) express low levels of IRF4, but DG75 cells obtained  
406 from Prof B. Kempkes (referred to here as DG75 wt parental cells) lack IRF4 expression.  
407 The DG75 RBPJ (CBF1) knock-out cell-line (SM224.9) was derived from DG75 wt  
408 parental cells (33). (46). IB4 (47) and GM12878 (obtained from Coriell Cell Repositories)  
409 are EBV immortalised lymphoblastoid cell lines (LCLs) generated by infection of resting  
410 B cells *in vitro*

411

412 *Plasmid construction*

413 The *miR-155HG* promoter sequence from -616 to +515 (Human GRCh37/hg19 chr 21  
414 26933842-26934972) was synthesized by GeneArt Strings® (Invitrogen) to include XhoI  
415 and HindIII restriction enzyme sites and cloned into pGL3 basic (Promega) to generate the  
416 pGL3 miR155HG promoter construct. The pGL3miR-155HG enhancer 1 (E1) construct  
417 was generated in a similar way by synthesis of the promoter and upstream E1 region (chr21  
418 26884583-26885197) as a single DNA fragment that was then cloned into pGL3 basic. To  
419 generate the miR-155HG promoter E1 + E2 construct, the promoter and E1 and E2 regions  
420 (chr21 26873921-26875152) were synthesized as a single DNA fragment and cloned into  
421 pGL3 basic. The pGL3-miR-155HG promoter E2 construct was generated using sequence

422 and ligation independent cloning. The E2 region was amplified by PCR from the miR-  
423 155HG promoter E1 + E2 construct using primers containing vector and insert sequences  
424 (forward 5'  
425 TCTTACGCGTGCTAGCCCGGGCTCGAGGAGAGGTTTAAAGCACTCAGACAGC  
426 3' and reverse 5'  
427 GGGCTTTGAGAACGTTTGTACCTCGAGGATCTAGAACCTCTGGAGTTGGAGA  
428 T 3'). The pGL3-miR-155HG promoter vector was digested with XhoI and then T4 DNA  
429 polymerase was used to further resect the cut ends to allow the insert to anneal to extended  
430 single-stranded regions of the vector. Single-strand DNA gap filling occurred through  
431 DNA repair following transformation of the plasmid into *E.coli*.

432

433 The *IRF4* promoter sequence from -739 to +359 (Human GRCh37/hg19 chr6 391024-  
434 392121) was synthesized by GeneArt (Invitrogen) and the promoter fragment was  
435 amplified from the supplied vector (pMK-RQ) using primers to introduce XhoI restriction  
436 sites at each end (forward 5' GTCTCGAGATTACAGGCTTGAGCCACA 3', reverse  
437 5'GACTCGAGCTGGACTCGGAGCTGAGG 3'). The promoter was then cloned into the  
438 XhoI site of pGL3 basic (Promega) to generate the pGL3 *IRF4* promoter construct. *IRF4*  
439 enhancer 1 (E1) (chr6 377854-379089) was amplified from genomic DNA using primers  
440 to introduce NheI and XhoI sites (5' forward  
441 GAGCTAGCATCGCTTGAGGTTGCAGTG 3' and reverse 5'  
442 GTCTCGAGTGAAGCAGGCACTGTGATTC 3'). The XhoI site was end filled using  
443 Klenow and the E1 fragment was cloned upstream of the promoter into the NheI and SmaI  
444 sites of the pGL3 *IRF4* promoter construct. E2 (chr6 365659-366654) was amplified by

445 PCR using primers designed to introduce SacI and NheI sites (forward 5'  
446 GAGAGCTCAGCCATCTCCATCATCTGGT 3' reverse 5'  
447 GAGCTAGCATGTGGAACGCTGGTCC 5') and cloned upstream of E1 into the SacI and  
448 NheI sites of the pGL3 IRF4 promoter E1 construct.

449

#### 450 *Luciferase reporter assays*

451 DG75 cell lines were electroporated with plasmid DNA at 260 V and 950  $\mu$ F (BioRad Gene  
452 Pulser II) using 0.4cm cuvettes and luciferase assays carried out as described previously  
453 with some modifications (48). Briefly, DG75 cells were diluted 1:2 into fresh medium 24  
454 hours prior to electroporation. For transfection, cells were pelleted and conditioned media  
455 reserved for later use. Cells were then resuspended in serum-free media to a density of  
456  $2 \times 10^7$  cells/ml. 500  $\mu$ l of cell suspension was pre-mixed with DNA and then added to the  
457 cuvette and immediately electroporated. Transfected cells were then transferred to 10 ml  
458 of pre-warmed conditioned media, and cultured for 48 hours in a humidified incubator at  
459 37°C, with 5% CO<sub>2</sub>.

460 Cells were transfected with 2 $\mu$ g of the pGL3 luciferase reporter plasmids and 0.5 $\mu$ g pRL-  
461 TK (Promega) as a transfection control where indicated. Transfection reactions also  
462 included 10 or 20  $\mu$ g of the EBNA2 expressing plasmid (pSG5 EBNA2), 5 or 10  $\mu$ g of  
463 IRF4 expressing plasmid (pCMV6XL5-IRF4, Cambridge Biosciences) or empty vector  
464 control. One tenth of each transfection was processed for Western blotting to analyse  
465 EBNA2, IRF4 and actin protein expression levels. The remaining cells were lysed and  
466 firefly and Renilla luciferase activity measured using the dual luciferase assay (Promega)

467 and a Glowmax multi detection system (Promega). For transfections where IRF4 was  
468 expressed, firefly luciferase signals were normalized to actin expression.

469

#### 470 *CRISPR*

471 CRISPR guides were designed using [www.benchling.com](http://www.benchling.com) to excise *miR-155HG* enhancer  
472 2 from the B cell genome in the IB4 LCL by targeting genomic regions located 5' and 3'  
473 of the enhancer. Guides were selected that had an on-target and off-target score that was  
474 above 60% (26873822 CTATCCTTAACAGAACACCC and 26875376  
475 TTTAACTAGAACCTTAGACA) and then ordered as TrueGuide Modified Synthetic  
476 sgRNAs from GeneArt (Invitrogen). IB4 cells were diluted 1:2 into fresh medium 24 hours  
477 prior to transfection.  $1 \times 10^6$  cells were then washed in PBS, pelleted and resuspended in 25  
478  $\mu$ l of resuspension Buffer R (Invitrogen). The guide RNA and Cas9 mix was prepared by  
479 adding 7.5 pmol of GeneArt TrueCut Cas9 Protein V2 (Invitrogen) and 7.5 pmol of  
480 sgRNAs to 5  $\mu$ l of resuspension Buffer R and incubating at room temperature for 10  
481 minutes. 5  $\mu$ l of cell suspension ( $2 \times 10^5$  cells) was then mixed with 7  $\mu$ l of the Cas9/sgRNA  
482 complex. 10  $\mu$ l of the cell Cas9/sgRNA mix was then electroporated using the Neon  
483 transfection system (Invitrogen) at 1700V for 20 ms with 1 pulse. Transfections were  
484 carried out in duplicate and electroporated cells were immediately transferred to two  
485 separate wells of a 24 well plate containing 0.5 ml of pre-warmed growth media. Cells  
486 were kept in a humidified incubator at 37°C, with 5% CO<sub>2</sub> for 72 hours. Cells were then  
487 sequentially diluted over a period of 2 weeks and subject to limited dilution in 96 well  
488 plates to obtain single cell clones. Cell line clones were screened by PCR for genomic  
489 deletion using the PHIRE Tissue Direct PCR Master Mix kit (Thermo Scientific). The

490 forward primer (5' AAATTCCTGGCTAGCTCCA 3') hybridized to a region 5' of  
491 enhancer 2 and two different reverse primers targeted either a region within enhancer 2  
492 (reverse primer 1, 5' AATGGGATGGCTGTCTGAGT 3') or a region 3' to enhancer 2  
493 (reverse primer 2, 5' CTGCTAAGGGAATGTTGAACAAA 3'). Deletions were  
494 confirmed by DNA sequencing of the PCR product generated using the forward PCR  
495 primer.

496

#### 497 *SDS-PAGE and Western Blotting*

498 SDS-PAGE and Western blotting was carried out as described previously (48, 49) using  
499 the anti-EBNA2 monoclonal antibody PE2 (gift from Prof M. Rowe) anti-actin 1/5000 (A-  
500 2066, Sigma) and IRF4 1/2000 (sc6059, Santa Cruz). Western blot visualization and signal  
501 quantification was carried out using a Li-COR Imager.

502

#### 503 *ChIP-QPCR*

504 ChIP-QPCR for RBPJ was carried out as described previously (24). *MiR-155HG* locus  
505 primers were located in the *miR-155HG* promoter (forward 5'  
506 AGCTGTAGGTTCCAAGAACAGG 3' and reverse 5'  
507 GACTCATAACCGACCAGGCG 3', *miR-155HG* enhancer 1 (forward 5'  
508 ACCTGTTGACTTGCCTAGAGAC 3' and reverse 5' TTCTGGTCTGTCTTCGCCAT  
509 3'), a 'trough' region between *miR-155HG* enhancer 1 and enhancer 2 (forward 5'  
510 TATTCAGCTATTCCAGGAGGCAG  
511 3' and reverse 5' GTGACATTATCTGCACAGCGAG 3'), and *miR-155HG* enhancer 2  
512 (forward 5' CCTAGTCTCTTCTCCATGAGC 3' and reverse 5'



513 AGTTGATTCCTGTGGACCATGA 3'). *IRF4* locus primers were located in the *IRF4*  
514 promoter (forward 5' TCCGTTACACGCTCTGCAA 3' and reverse 5'  
515 CCTCAGGAGGCCAGTCAATC 3'), a 'trough' region between the *IRF4* promoter and  
516 enhancer 1 (forward 5' TGTGACAAGTGACGGTATGCT 3' and reverse 5'  
517 TTGTAACAGCGCCTAATGTTGG 3'), *IRF4* enhancer 1 (forward 5'  
518 TTACCACCTGGGTACCTGTCT 3' and reverse 5' ACAGTAGCATGCAGCACTCTC  
519 3') and *IRF4* enhancer 2 (forward 5' AGTGAGACGTGTGTCAGAGG 3' and reverse 5'  
520 AAGCAGGCACTGTGATTCCA 3').

521

#### 522 *RT-QPCR*

523 Total RNA was extracted using TriReagent (Sigma) and RNA samples then purified using  
524 the RNeasy kit (Qiagen). RNA concentrations were determined using a Nanodrop 2000  
525 (Thermo Scientific) and 1 µg was used to prepare cDNA using the ImProm II reverse  
526 transcription kit with random primers (Promega). Quantitative PCR was performed in  
527 duplicate using the standard curve absolute quantification method on an Applied  
528 Biosystems 7500 real-time PCR machine as described previously (23) using published  
529 QPCR primers for *mIR-155HG* (BIC) (29) (forward  
530 5'ACCAGAGACCTTACCTGTACCTT3' and reverse  
531 5'GGCATAAAGAATTTAAACCACAGATTT 3') and GAPDH (forward 5'  
532 TCAAGATCATCAGCAATGCC 3' and reverse 5' CATGAGTCCTTCCACGATACC  
533 3')

534

#### 535 *Capture Hi-C*

536 Previously described capture Hi-C data from GM12878 and CD34+ cells were examined

537 for interactions that were captured using baits comprising a 13,140 bp HindIII fragment  
538 encompassing the *mIR-155HG* promoter (GRCh38/hg19 chr21:26926437-26939577) and  
539 a 2,478 bp HindIII fragment that encompasses the miR-155 genomic sequence in exon 3  
540 (GRCh38/hg19 chr21:26945874-26948352).

541

## 542 **ACKNOWLEDGEMENTS**

543 This work was funded by the Medical Research Council (MR/K01952X/1) to MJW and  
544 Bloodwise (15024 to MJW and 14007 to CSO). Funding for open access charge: Medical  
545 Research Council.

546

## 547 **REFERENCES**

548

- 549 1. Sayed D, Abdellatif M. 2011. MicroRNAs in development and disease. *Physiol*  
550 *Rev* 91:827-87.
- 551 2. Tam W, Dahlberg JE. 2006. miR-155/BIC as an oncogenic microRNA. *Genes*  
552 *Chromosomes Cancer* 45:211-2.
- 553 3. Clurman BE, Hayward WS. 1989. Multiple proto-oncogene activations in avian  
554 leukemia virus-induced lymphomas: evidence for stage-specific events. *Mol Cell*  
555 *Biol* 9:2657-64.
- 556 4. Tam W, Ben-Yehuda D, Hayward WS. 1997. *bic*, a novel gene activated by proviral  
557 insertions in avian leukemia virus-induced lymphomas, is likely to function through  
558 its noncoding RNA. *Mol Cell Biol* 17:1490-502.
- 559 5. van den Berg A, Kroesen BJ, Kooistra K, de Jong D, Briggs J, Blokzijl T, Jacobs  
560 S, Kluiver J, Diepstra A, Maggio E, Poppema S. 2003. High expression of B-cell  
561 receptor inducible gene BIC in all subtypes of Hodgkin lymphoma. *Genes*  
562 *Chromosomes Cancer* 37:20-8.
- 563 6. Rodriguez A, Vigorito E, Clare S, Warren MV, Couttet P, Soond DR, van Dongen  
564 S, Grocock RJ, Das PP, Miska EA, Vetrie D, Okkenhaug K, Enright AJ, Dougan  
565 G, Turner M, Bradley A. 2007. Requirement of *bic*/microRNA-155 for normal  
566 immune function. *Science* 316:608-11.
- 567 7. Costinean S, Zanesi N, Pekarsky Y, Tili E, Volinia S, Heerema N, Croce CM. 2006.  
568 Pre-B cell proliferation and lymphoblastic leukemia/high-grade lymphoma in  
569 E(mu)-miR155 transgenic mice. *Proc Natl Acad Sci U S A* 103:7024-9.
- 570 8. Kluiver J, Poppema S, de Jong D, Blokzijl T, Harms G, Jacobs S, Kroesen BJ, van  
571 den Berg A. 2005. BIC and miR-155 are highly expressed in Hodgkin, primary  
572 mediastinal and diffuse large B cell lymphomas. *J Pathol* 207:243-9.

- 573 9. Eis PS, Tam W, Sun L, Chadburn A, Li Z, Gomez MF, Lund E, Dahlberg JE. 2005.  
574 Accumulation of miR-155 and BIC RNA in human B cell lymphomas. *Proc Natl*  
575 *Acad Sci U S A* 102:3627-32.
- 576 10. Faraoni I, Antonetti FR, Cardone J, Bonmassar E. 2009. miR-155 gene: a typical  
577 multifunctional microRNA. *Biochim Biophys Acta* 1792:497-505.
- 578 11. Bayraktar R, Van Roosbroeck K. 2018. miR-155 in cancer drug resistance and as  
579 target for miRNA-based therapeutics. *Cancer Metastasis Rev* 37:33-44.
- 580 12. Mrazek J, Kreutmayer SB, Grasser FA, Polacek N, Huttenhofer A. 2007.  
581 Subtractive hybridization identifies novel differentially expressed ncRNA species  
582 in EBV-infected human B cells. *Nucleic Acids Res* 35:e73.
- 583 13. Linnstaedt SD, Gottwein E, Skalsky RL, Luftig MA, Cullen BR. 2010. Virally  
584 induced cellular microRNA miR-155 plays a key role in B-cell immortalization by  
585 Epstein-Barr virus. *J Virol* 84:11670-8.
- 586 14. Lu F, Weidmer A, Liu CG, Volinia S, Croce CM, Lieberman PM. 2008. Epstein-  
587 Barr virus-induced miR-155 attenuates NF-kappaB signaling and stabilizes latent  
588 virus persistence. *J Virol* 82:10436-43.
- 589 15. Skalsky RL, Samols MA, Plaisance KB, Boss IW, Riva A, Lopez MC, Baker HV,  
590 Renne R. 2007. Kaposi's sarcoma-associated herpesvirus encodes an ortholog of  
591 miR-155. *J Virol* 81:12836-45.
- 592 16. Gottwein E, Mukherjee N, Sachse C, Frenzel C, Majoros WH, Chi JT, Braich R,  
593 Manoharan M, Soutschek J, Ohler U, Cullen BR. 2007. A viral microRNA  
594 functions as an orthologue of cellular miR-155. *Nature* 450:1096-9.
- 595 17. Zhao Y, Yao Y, Xu H, Lambeth L, Smith LP, Kgosana L, Wang X, Nair V. 2009.  
596 A functional MicroRNA-155 ortholog encoded by the oncogenic Marek's disease  
597 virus. *J Virol* 83:489-92.
- 598 18. Yin Q, McBride J, Fewell C, Lacey M, Wang X, Lin Z, Cameron J, Flemington  
599 EK. 2008. MicroRNA-155 is an Epstein-Barr virus-induced gene that modulates  
600 Epstein-Barr virus-regulated gene expression pathways. *J Virol* 82:5295-306.
- 601 19. Gatto G, Rossi A, Rossi D, Kroening S, Bonatti S, Mallardo M. 2008. Epstein-Barr  
602 virus latent membrane protein 1 trans-activates miR-155 transcription through the  
603 NF-kappaB pathway. *Nucleic Acids Res* 36:6608-19.
- 604 20. Wang F, Tsang SF, Kurilla MG, Cohen JI, Kieff E. 1990. Epstein-Barr virus nuclear  
605 antigen 2 transactivates latent membrane protein LMP1. *J Virol* 64:3407-16.
- 606 21. Cohen JI, Wang F, Mannick J, Kieff E. 1989. Epstein-Barr virus nuclear protein 2  
607 is a key determinant of lymphocyte transformation. *Proc Natl Acad Sci U S A*  
608 86:9558-62.
- 609 22. Zhao B, Zou J, Wang H, Johannsen E, Peng CW, Quackenbush J, Mar JC, Morton  
610 CC, Freedman ML, Blacklow SC, Aster JC, Bernstein BE, Kieff E. 2011. Epstein-  
611 Barr virus exploits intrinsic B-lymphocyte transcription programs to achieve  
612 immortal cell growth. *Proc Natl Acad Sci U S A* 108:14902-7.
- 613 23. McClellan MJ, Wood CD, Ojeniyi O, Cooper TJ, Kanhere A, Arvey A, Webb HM,  
614 Palermo RD, Harth-Hertle ML, Kempkes B, Jenner RG, West MJ. 2013.  
615 Modulation of enhancer looping and differential gene targeting by Epstein-Barr  
616 virus transcription factors directs cellular reprogramming. *PLoS Pathog*  
617 9:e1003636.

- 618 24. Gunnell A, Webb HM, Wood CD, McClellan MJ, Wichaidit B, Kempkes B, Jenner  
619 RG, Osborne C, Farrell PJ, West MJ. 2016. RUNX super-enhancer control through  
620 the Notch pathway by Epstein-Barr virus transcription factors regulates B cell  
621 growth. *Nucleic Acids Res* 44:4636-50.
- 622 25. Zhou H, Schmidt SC, Jiang S, Willox B, Bernhardt K, Liang J, Johannsen EC,  
623 Kharchenko P, Gewurz BE, Kieff E, Zhao B. 2015. Epstein-Barr Virus Oncoprotein  
624 Super-enhancers Control B Cell Growth. *Cell Host Microbe* 17:205-16.
- 625 26. Wood CD, Veenstra H, Khasnis S, Gunnell A, Webb HM, Shannon-Lowe C,  
626 Andrews S, Osborne CS, West MJ. 2016. MYC activation and BCL2L1 silencing  
627 by a tumour virus through the large-scale reconfiguration of enhancer-promoter  
628 hubs. *Elife* 5.
- 629 27. West MJ. 2017. Chromatin reorganisation in Epstein-Barr virus-infected cells and  
630 its role in cancer development. *Curr Opin Virol* 26:149-155.
- 631 28. Jiang S, Zhou H, Liang J, Gerdt C, Wang C, Ke L, Schmidt SCS, Narita Y, Ma Y,  
632 Wang S, Colson T, Gewurz B, Li G, Kieff E, Zhao B. 2017. The Epstein-Barr Virus  
633 Regulome in Lymphoblastoid Cells. *Cell Host Microbe* 22:561-573 e4.
- 634 29. Wang L, Toomey NL, Diaz LA, Walker G, Ramos JC, Barber GN, Ning S. 2011.  
635 Oncogenic IRFs provide a survival advantage for Epstein-Barr virus- or human T-  
636 cell leukemia virus type 1-transformed cells through induction of BIC expression.  
637 *J Virol* 85:8328-37.
- 638 30. Xu D, Zhao L, Del Valle L, Miklossy J, Zhang L. 2008. Interferon regulatory factor  
639 4 is involved in Epstein-Barr virus-mediated transformation of human B  
640 lymphocytes. *J Virol* 82:6251-8.
- 641 31. Spender LC, Lucchesi W, Bodelon G, Bilancio A, Karstegl CE, Asano T, Dittrich-  
642 Breiholz O, Kracht M, Vanhaesebroeck B, Farrell PJ. 2006. Cell target genes of  
643 Epstein-Barr virus transcription factor EBNA-2: induction of the p55alpha  
644 regulatory subunit of PI3-kinase and its role in survival of EREB2.5 cells. *J Gen  
645 Virol* 87:2859-67.
- 646 32. Ma Y, Walsh MJ, Bernhardt K, Ashbaugh CW, Trudeau SJ, Ashbaugh IY, Jiang S,  
647 Jiang C, Zhao B, Root DE, Doench JG, Gewurz BE. 2017. CRISPR/Cas9 Screens  
648 Reveal Epstein-Barr Virus-Transformed B Cell Host Dependency Factors. *Cell  
649 Host Microbe* 21:580-591 e7.
- 650 33. Maier S, Santak M, Mantik A, Grabusic K, Kremmer E, Hammerschmidt W,  
651 Kempkes B. 2005. A somatic knockout of CBF1 in a human B-cell line reveals that  
652 induction of CD21 and CCR7 by EBNA-2 is strictly CBF1 dependent and that  
653 downregulation of immunoglobulin M is partially CBF1 independent. *J Virol*  
654 79:8784-92.
- 655 34. Tzellos S, Correia PB, Karstegl CE, Cancian L, Cano-Flanagan J, McClellan MJ,  
656 West MJ, Farrell PJ. 2014. A Single Amino Acid in EBNA-2 Determines Superior  
657 B Lymphoblastoid Cell Line Growth Maintenance by Epstein-Barr Virus Type 1  
658 EBNA-2. *J Virol* 88:8743-53.
- 659 35. Almohammed R, Osborn K, Ramasubramanyan S, Perez-Fernandez IBN, Godfrey  
660 A, Mancini EJ, Sinclair AJ. 2018. Mechanism of activation of the BNLF2a immune  
661 evasion gene of Epstein-Barr virus by Zta. *J Gen Virol* doi:10.1099/jgv.0.001056.
- 662 36. Waltzer L, Logeat F, Brou C, Israel A, Sergeant A, Manet E. 1994. The human J  
663 kappa recombination signal sequence binding protein (RBP-J kappa) targets the

- 664 Epstein-Barr virus EBNA2 protein to its DNA responsive elements. *Embo J*  
665 13:5633-8.
- 666 37. Zimmer-Strobl U, Strobl LJ, Meitinger C, Hinrichs R, Sakai T, Furukawa T, Honjo  
667 T, Bornkamm GW. 1994. Epstein-Barr virus nuclear antigen 2 exerts its  
668 transactivating function through interaction with recombination signal binding  
669 protein RBP-J kappa, the homologue of *Drosophila* Suppressor of Hairless. *Embo J*  
670 13:4973-82.
- 671 38. Johannsen E, Koh E, Mosialos G, Tong X, Kieff E, Grossman SR. 1995. Epstein-  
672 Barr virus nuclear protein 2 transactivation of the latent membrane protein 1  
673 promoter is mediated by J kappa and PU.1. *J Virol* 69:253-62.
- 674 39. Querfeld C, Pacheco T, Foss FM, Halwani AS, Porcu P, Seto AG, Ruckman J,  
675 Landry ML, Jackson AL, Pestano LA, Dickinson BA, Sanseverino M, Rodman  
676 DM, Gordon G, Marshall W. 2016. Preliminary Results of a Phase 1 Trial  
677 Evaluating MRG-106, a Synthetic microRNA Antagonist (LNA antimir) of  
678 microRNA-155, in Patients with CTCL. *Blood* 128.
- 679 40. Khalife J, Radomska HS, Santhanam R, Huang X, Neviani P, Saultz J, Wang H,  
680 Wu YZ, Alachkar H, Anghelina M, Dorrance A, Curfman J, Bloomfield CD,  
681 Medeiros BC, Perrotti D, Lee LJ, Lee RJ, Caligiuri MA, Pichiorri F, Croce CM,  
682 Garzon R, Guzman ML, Mender JH, Marcucci G. 2015. Pharmacological targeting  
683 of miR-155 via the NEDD8-activating enzyme inhibitor MLN4924 (Pevonedistat)  
684 in FLT3-ITD acute myeloid leukemia. *Leukemia* 29:1981-92.
- 685 41. Chapuy B, McKeown MR, Lin CY, Monti S, Roemer MG, Qi J, Rahl PB, Sun HH,  
686 Yeda KT, Doench JG, Reichert E, Kung AL, Rodig SJ, Young RA, Shipp MA,  
687 Bradner JE. 2013. Discovery and characterization of super-enhancer-associated  
688 dependencies in diffuse large B cell lymphoma. *Cancer Cell* 24:777-90.
- 689 42. Chipumuro E, Marco E, Christensen CL, Kwiatkowski N, Zhang T, Hatheway CM,  
690 Abraham BJ, Sharma B, Yeung C, Altabef A, Perez-Atayde A, Wong KK, Yuan  
691 GC, Gray NS, Young RA, George RE. 2014. CDK7 inhibition suppresses super-  
692 enhancer-linked oncogenic transcription in MYCN-driven cancer. *Cell* 159:1126-  
693 39.
- 694 43. Gerlach D, Tontsch-Grunt U, Baum A, Popow J, Scharn D, Hofmann MH,  
695 Engelhardt H, Kaya O, Beck J, Schweifer N, Gerstberger T, Zuber J, Savarese F,  
696 Kraut N. 2018. The novel BET bromodomain inhibitor BI 894999 represses super-  
697 enhancer-associated transcription and synergizes with CDK9 inhibition in AML.  
698 *Oncogene* doi:10.1038/s41388-018-0150-2.
- 699 44. Duan Q, Mao X, Xiao Y, Liu Z, Wang Y, Zhou H, Zhou Z, Cai J, Xia K, Zhu Q,  
700 Qi J, Huang H, Plutzky J, Yang T. 2016. Super enhancers at the miR-146a and miR-  
701 155 genes contribute to self-regulation of inflammation. *Biochim Biophys Acta*  
702 1859:564-71.
- 703 45. Ben-Bassat H, Goldblum N, Mitrani S, Goldblum T, Yoffey JM, Cohen MM,  
704 Bentwich Z, Ramot B, Klein E, Klein G. 1977. Establishment in continuous culture  
705 of a new type of lymphocyte from a "Burkitt like" malignant lymphoma (line D.G.-  
706 75). *Int J Cancer* 19:27-33.
- 707 46. Gregory CD, Rowe M, Rickinson AB. 1990. Different Epstein-Barr virus-B cell  
708 interactions in phenotypically distinct clones of a Burkitt's lymphoma cell line. *J*  
709 *Gen Virol* 71 ( Pt 7):1481-95.

- 710 47. Takada K. 1984. Cross-linking of cell surface immunoglobulins induces Epstein-  
711 Barr virus in Burkitt lymphoma lines. *Int J Cancer* 33:27-32.
- 712 48. West MJ, Webb HM, Sinclair AJ, Woolfson DN. 2004. Biophysical and mutational  
713 analysis of the putative bZIP domain of Epstein-Barr virus EBNA 3C. *J Virol*  
714 78:9431-45.
- 715 49. Bark-Jones SJ, Webb HM, West MJ. 2006. EBV EBNA 2 stimulates CDK9-  
716 dependent transcription and RNA polymerase II phosphorylation on serine 5.  
717 *Oncogene* 25:1775-85.
- 718 50. Mifsud B, Tavares-Cadete F, Young AN, Sugar R, Schoenfelder S, Ferreira L,  
719 Wingett SW, Andrews S, Grey W, Ewels PA, Herman B, Happe S, Higgs A,  
720 LeProust E, Follows GA, Fraser P, Luscombe NM, Osborne CS. 2015. Mapping  
721 long-range promoter contacts in human cells with high-resolution capture Hi-C.  
722 *Nat Genet* 47:598-606.  
723  
724  
725

726 **FIGURE LEGENDS**

727 **FIG 1.** Chromosome interactions and EBNA2 binding at the *miR-155HG* locus on  
728 chromosome 21. Capture Hi-C interaction data obtained using *HindIII* fragments  
729 encompassing the *miR-155HG* promoter (top panel) or the miR-155 genomic locus (bottom  
730 panel) as bait (red boxes above CHi-C data bar charts). Bar charts show the geometric mean  
731 of sequencing reads rainbow colored by read frequency according to the scale bar.  
732 Interacting fragments were captured from Hi-C libraries generated from the EBV infected  
733 LCL GM12878 or CD34+ progenitor cells (50). The main interacting regions are shown in  
734 boxes with dashed lines. EBNA 2 ChIP-sequencing reads in GM12878 cells (24) and  
735 H3K27Ac signals in GM12878 from ENCODE are shown (middle panel). The positions  
736 of the two main EBNA2-bound putative enhancer regions are indicated (E1 and E2).

737

738 **FIG 2.** The effects of EBNA2 on *miR-155HG* promoter and enhancer elements. (A) *miR-*  
739 *155HG* luciferase reporter assays in the presence or absence of EBNA2. DG75 cells were  
740 transfected with 2  $\mu$ g of pGL3 firefly luciferase reporter constructs containing the *miR-*  
741 *155HG* promoter either alone or in the presence of enhancer E1, E2 or both E1 and E2.  
742 Assays were carried out in the absence or presence of 10 or 20  $\mu$ g of the EBNA2-expressing  
743 plasmid pSG5-EBNA2 and 0.5  $\mu$ g of Renilla luciferase control plasmid (pRL-TK). Firefly  
744 luciferase signals were normalized to Renilla luciferase signals and expressed relative to  
745 the signal obtained for the *miR-155HG* promoter in the absence of EBNA2. Results show  
746 the mean of three independent experiments plus or minus standard deviation. Fold  
747 activation by EBNA2 relative to the signal obtained for each construct in the absence of  
748 EBNA2 is shown above each bar. Western blot analysis of EBNA2 and IRF4 expression

749 is shown below each bar chart, with actin providing a loading control. All blots shown were  
750 probed at the same time with the same batch of antibody solution and for each protein show  
751 the same exposure. They are therefore directly comparable, but have been cut and placed  
752 to align with the respective luciferase assay graphs. The asterisk shows the position of a  
753 non-specific band visible on longer exposures of EBNA2 blots. (B) EBNA2 activation of  
754 an EBV C promoter reporter construct was used as a positive control. (C) ChIP-QPCR  
755 analysis of RBPJ $\kappa$  binding at the *miR-155HG* locus in GM12878 cells. Precipitated DNA  
756 was analysed using primer sets located at the promoter, E1, E2 and in a trough between E1  
757 and E2 (T). EBNA2 binding at the transcription start site of *PPIA* and at the previously  
758 characterised *CTBP2* binding site were used as negative and positive binding controls,  
759 respectively. Mean percentage input signals, after subtraction of no antibody controls, are  
760 shown plus or minus standard deviation for three independent ChIP experiments. (D)  
761 Luciferase reporter assays carried out using the *miR-155HG* promoter or *miR-155HG* E1  
762 and E2 construct in DG75 wt parental cells that lack IRF4 expression and the  
763 corresponding RBPJ $\kappa$  knock out cell line. Results are displayed as in (B). (E). Luciferase  
764 reporter assays carried out as in (D) using the RBP-J–dependent C promoter reporter  
765 construct.

766

767 **FIG 3.** The effects of IRF4 on *miR-155HG* promoter and enhancer elements. DG75 cells  
768 were transfected with 2  $\mu$ g of pGL3 firefly luciferase reporter constructs containing the  
769 *miR-155HG* promoter either alone or in the presence of enhancer E1, E2 or both E1 and  
770 E2. Assays were carried out in the absence or presence of 5 or 10  $\mu$ g of the IRF4-expressing  
771 plasmid pCMV6XL5-IRF4. Western blot analysis of IRF4 and actin expression is shown



772 below the bar chart. Firefly luciferase signals were normalized to actin western blot signals  
773 and fold activation relative to the signal for each construct in the absence of EBNA2 is  
774 shown. Results show the mean of three independent experiments plus or minus standard  
775 deviation.

776 **FIG 4.** The effects of EBNA2 on *IRF4* promoter and enhancer elements. (A) EBNA2  
777 ChIP-sequencing reads at the *IRF4* locus in Mutu III Burkitt's lymphoma cells (23). The  
778 positions of the two main EBNA2-bound putative enhancer regions are indicated (E1 and  
779 E2). (B) *IRF4* luciferase reporter assays in the presence or absence of EBNA2. DG75 cells  
780 were transfected with 2 µg of pGL3 firefly luciferase reporter constructs containing the  
781 *IRF4* promoter either alone or in the presence of enhancer E1 or both E1 and E2. Assays  
782 were carried out in the absence or presence of 10 or 20 µg of the EBNA2-expressing  
783 plasmid pSG5-EBNA2 and 0.5 µg of Renilla luciferase control plasmid (pRL-TK). Firefly  
784 luciferase signals were normalized to Renilla luciferase signals and expressed relative to  
785 the signal obtained for the *IRF4* promoter in the absence of EBNA2. EBNA2 activation of  
786 an EBV C promoter reporter construct was used as a positive control. Results show the  
787 mean of three independent experiments plus or minus standard deviation. Fold activation  
788 by EBNA2 relative to the signal obtained for each construct in the absence of EBNA2 is  
789 shown above each bar. Western blot analysis of EBNA2 is shown below each bar chart,  
790 with actin providing a loading control. (C) ChIP-QPCR analysis of RBPJκ binding at the  
791 *IRF4* locus in GM12878 cells. Precipitated DNA was analysed using primer sets located at  
792 the promoter, E1, E2 and in a trough between the promoter and E1 (T). EBNA2 binding at  
793 the transcription start site of *PPIA* and at the previously characterised *CTBP2* binding site  
794 were used as negative and positive binding controls, respectively. Mean percentage input

795 signals, after subtraction of no antibody controls, are shown plus or minus standard  
796 deviation for three independent ChIP experiments. **(D)** Luciferase reporter assays carried  
797 out using the *IRF4* promoter, *IRF4* E1 and E2 construct and the RBPJ-dependent C  
798 promoter reporter construct in DG75 wt parental cells and the corresponding RBPJ $\kappa$  knock  
799 out cell line. Results are displayed as in (B).

800

801 **FIG 5.** The effects of CRIPSR/Cas9-mediated deletion of *miR-155HG* enhancer 2. **(A)**  
802 EBNA 2 ChIP-sequencing reads in GM12878 cells (24) and H3K27Ac signals in  
803 GM12878 from ENCODE at the *miR-155HG* enhancer 2 region. The locations of the guide  
804 RNAs used for CRISPR gene editing and the PCR primers used for screening cell clones  
805 are indicated. **(B)** PCR analysis of single cell clones obtained by limited deletion following  
806 transfection of guide RNAs and Cas 9 protein using primers that span the deletion site and  
807 only efficiently amplifies a product (180 bp) from templates carrying an E2 deletion. **(C)**  
808 DNA sequence of the deletion spanning PCR products from the C4A, C2B and C5B cell  
809 lines. Black uppercase text shows the sequence present in the PCR products and blue  
810 lowercase text shows the 5' and 3' ends of the deleted region, with forward slashes showing  
811 the position of the remaining ~1.5 kb of deleted DNA. The sgRNA target sequences are  
812 underlined and PAM sequences are shown in grey. **(D)** QPCR analysis of total RNA  
813 extracted from IB4 cells or cell line clones using primers specific for *miR-155HG* and  
814 GAPDH. *miR-155HG* signals were normalized by dividing by GAPDH signals and  
815 expression levels are shown relative to the signal in IB4 parental cells. Results show the  
816 mean  $\pm$  standard deviation of PCR duplicates from a representative experiment.

817

818 **FIG 6.** Model for enhancer activation of *IRF4* and *miR155HG* by EBV EBNA2. EBNA2  
819 targets an intergenic enhancer 35 kb upstream of *IRF4* via RBPJ. A super-enhancer  
820 upstream of *DUSP22* bound by EBNA 2 also links to both *DUSP22* and *IRF4*. IRF4 then  
821 activates *miR-155HG* via the promoter and an intergenic enhancer located 60 kb upstream.  
822 EBNA2 activates the *miR-155HG* upstream enhancer via RBPJ. The *miR-155HG* promoter  
823 also links to an additional upstream region and the *LINC00158* gene.  
824

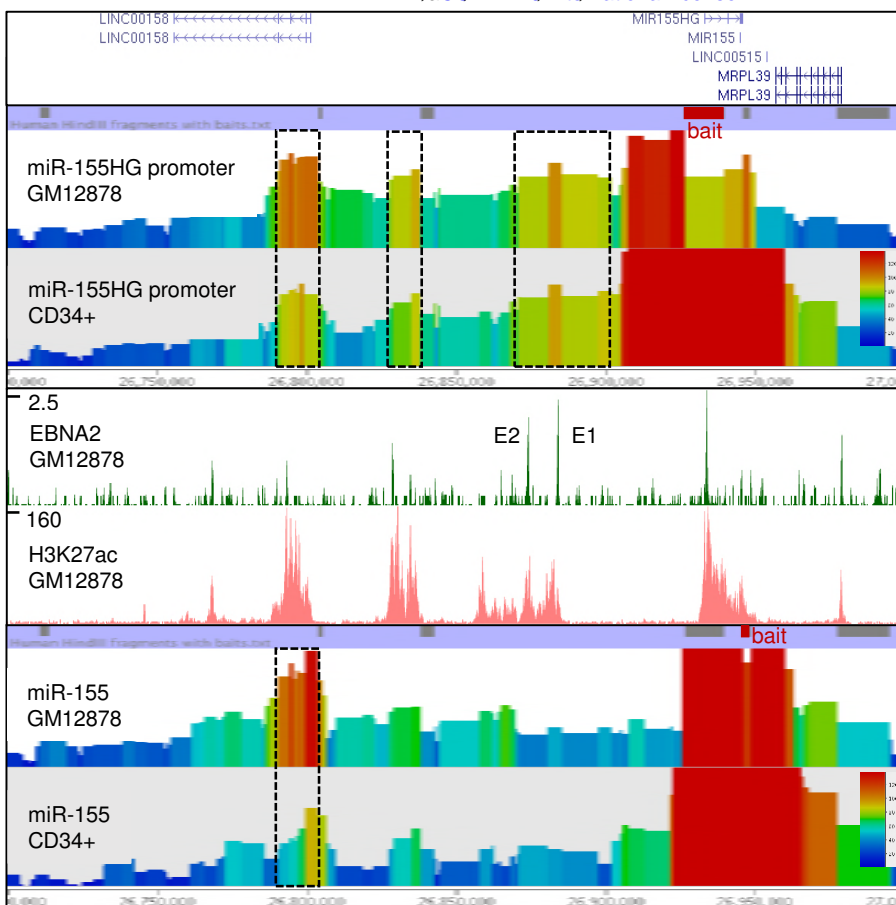

Figure 1

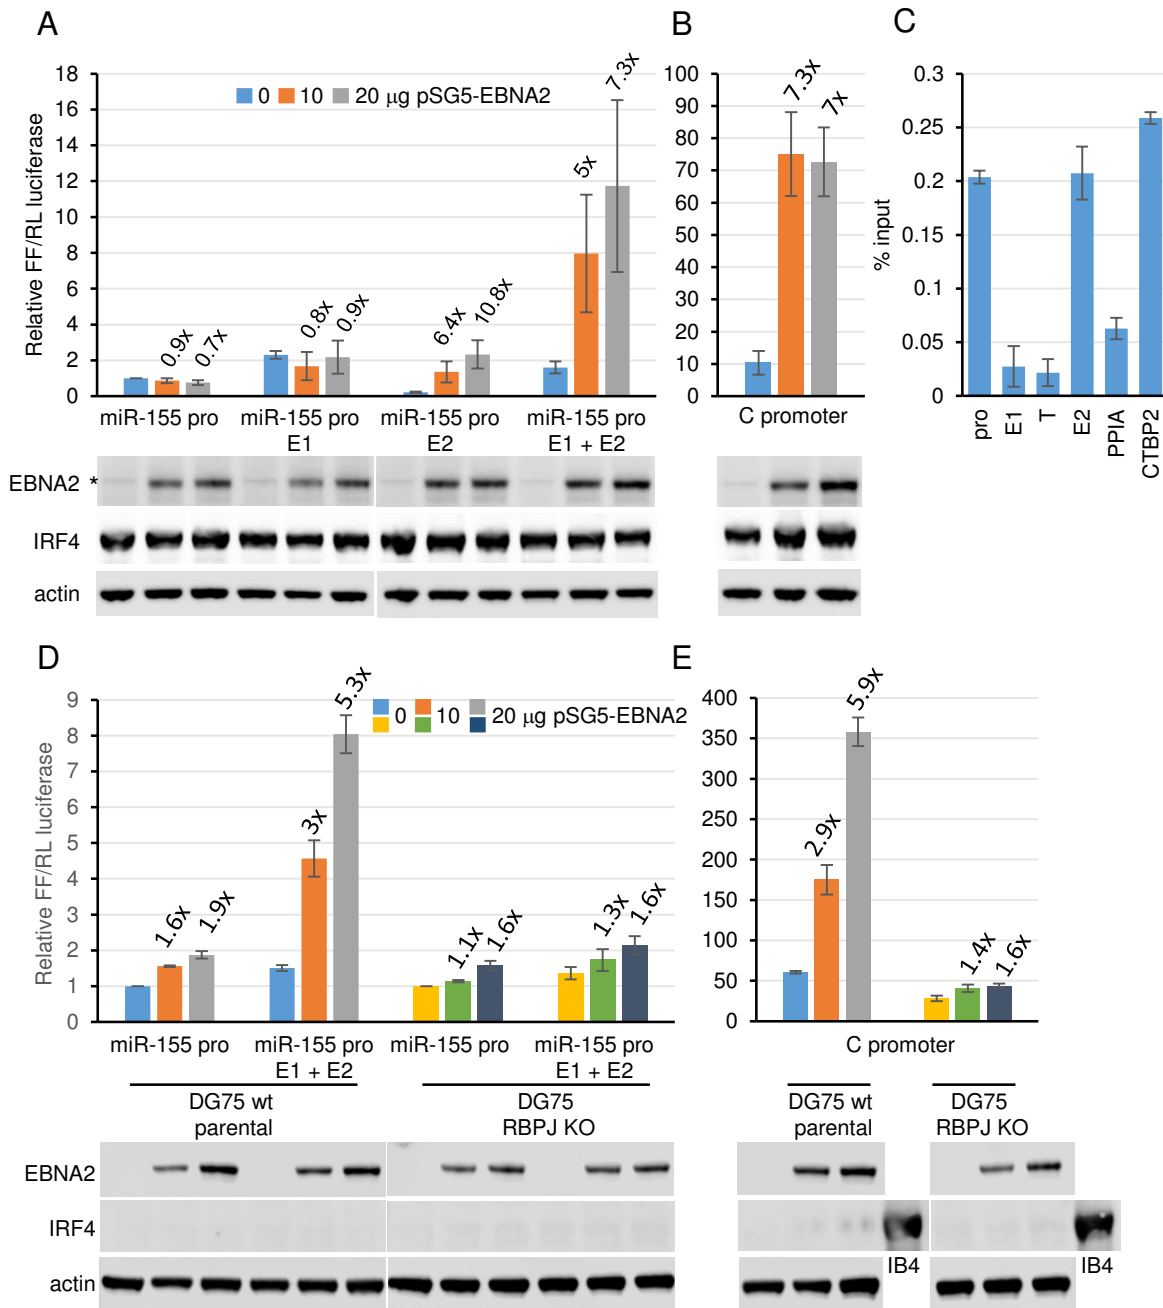

Figure 2

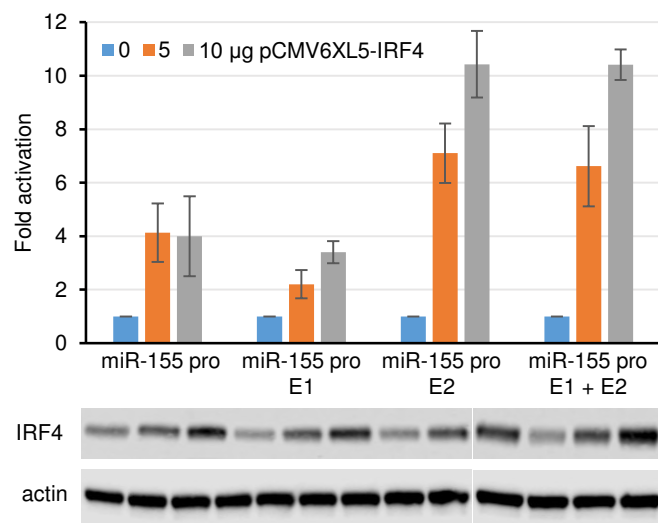

Figure 3

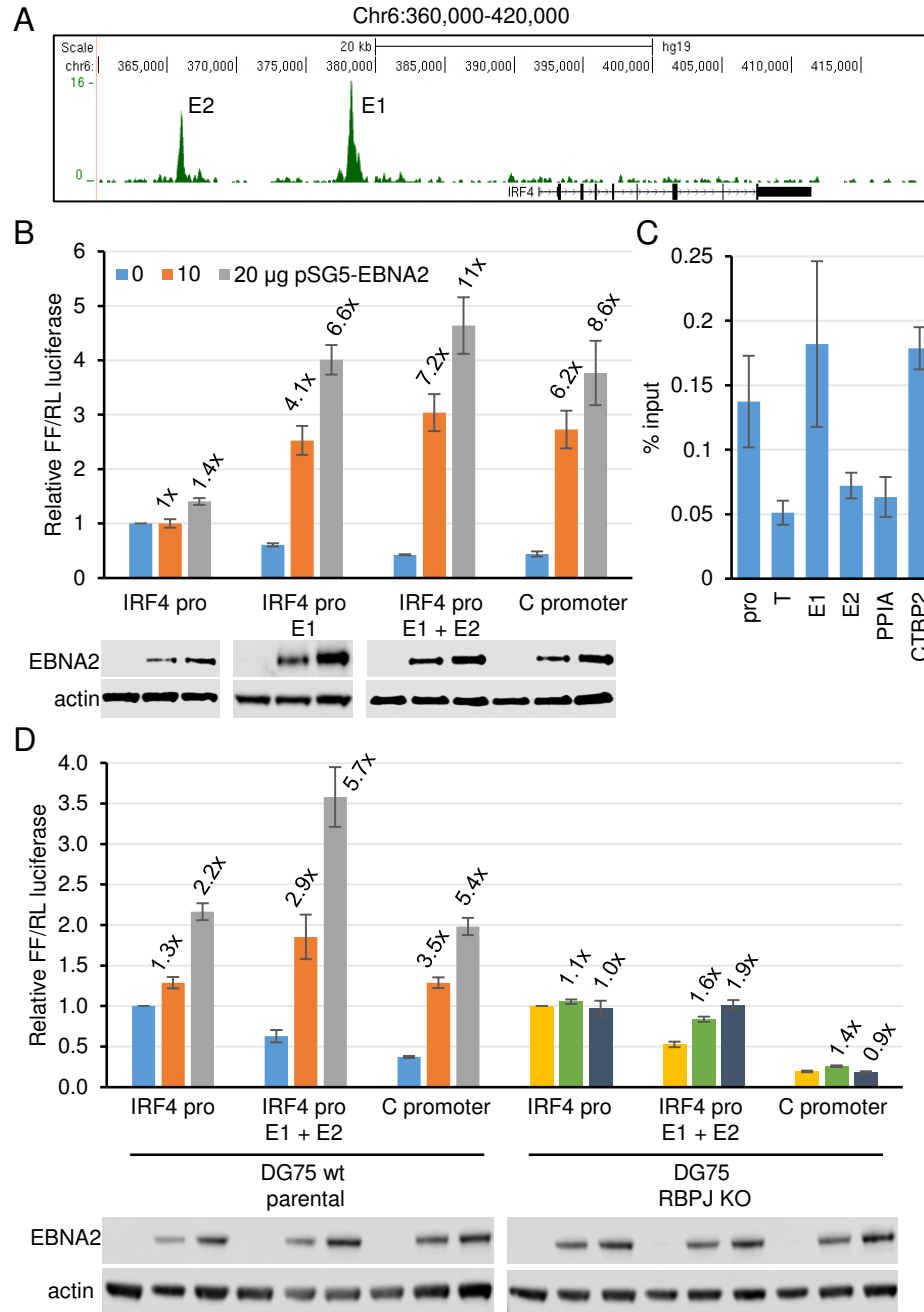

Figure 4

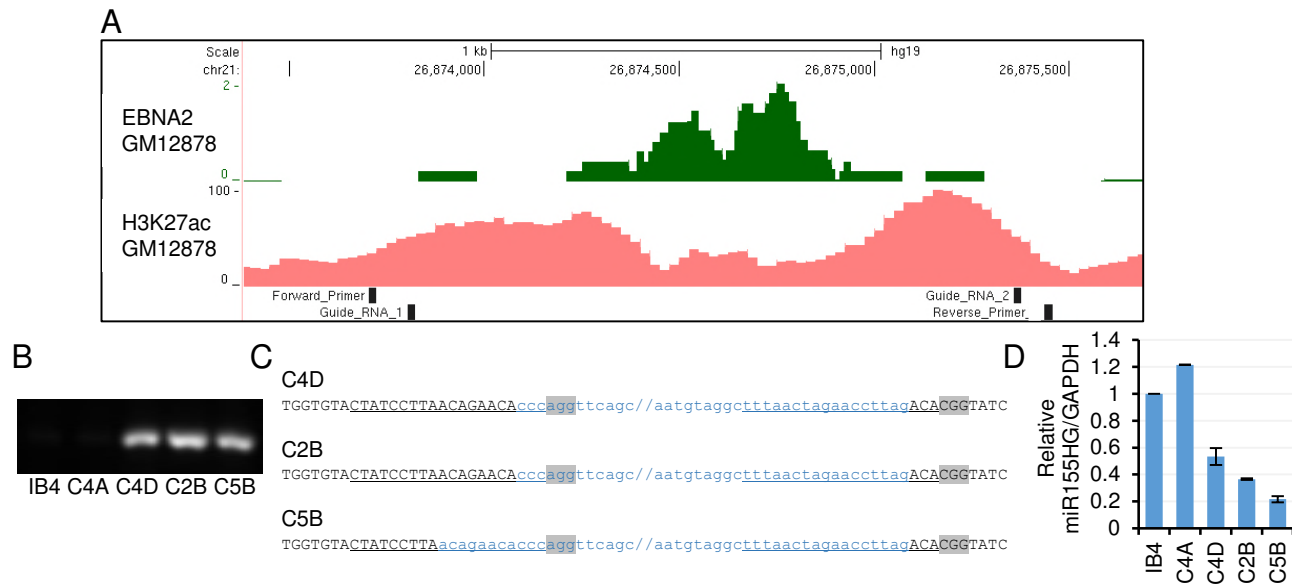

Figure 5



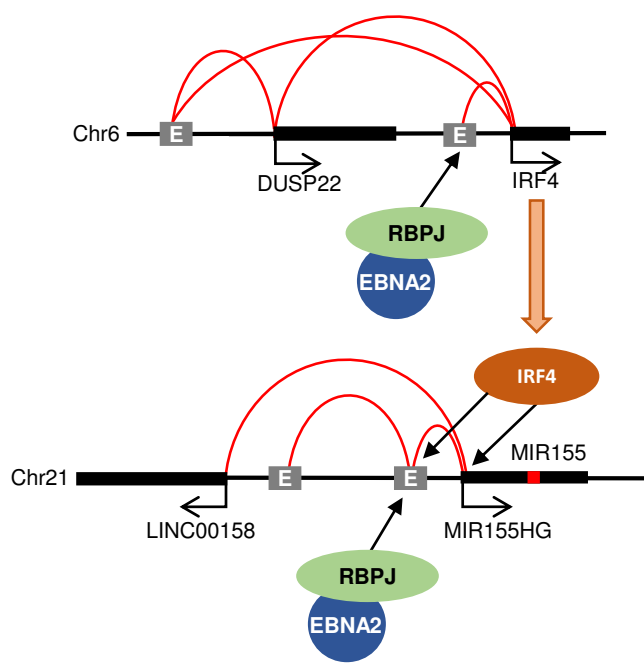

Figure 6
